# Supplementary material for: Multiscale characterization, modeling and simulation of packed bed reactor for direct conversion of syngas to dimethyl ether
Source: Royal Society of Chemistry journal article supplement (doi:10.1039/d4su00602j), 2025-01-01
Supplement: d4su00602j1.pdf [file d4su00602j1.pdf]

## Supplementary Information

### Multiscale characterization, modeling and simulation of packed bed reactor for direct conversion of syngas to dimethyl ether

Ginu R. George<sup>1</sup>, Adam Yonge<sup>2</sup>, Meagan F. Crowley<sup>2\*</sup>, Anh T. To<sup>3</sup>, Peter N. Ciesielski<sup>2\*</sup>, Canan Karakaya<sup>1\*</sup>

<sup>1</sup>Manufacturing Science Division, Oak Ridge National Laboratory, Oak Ridge, TN, 37830, United States.

<sup>2</sup>Biosciences Center and National Bioenergy Center, National Renewable Energy Laboratory, Golden, CO, 80401, United States.

<sup>3</sup>Catalytic Carbon Transformation & Scale-up Center, National Renewable Energy Laboratory, Golden, CO, 80401, United States.

\*Corresponding authors: [peter.ciesielski@nrel.gov](mailto:peter.ciesielski@nrel.gov); [karakayac@ornl.gov](mailto:karakayac@ornl.gov)

#### S1. Al<sub>2</sub>O<sub>3</sub> packed bed MicroCT characterization

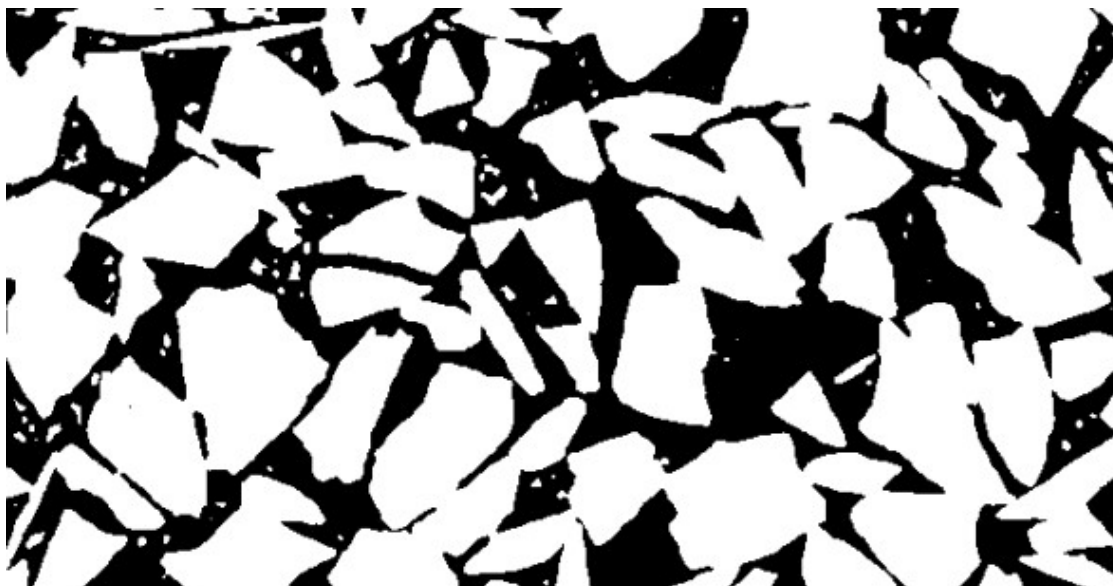

**Figure S1:** Example visual slice of the Al<sub>2</sub>O<sub>3</sub> packed bed processed using MicroCT and MATBOX postprocessing.

**Table S1:** List of physical properties of the  $\text{Al}_2\text{O}_3$  packed bed found using the MATBOX software. Here directions 1, 2, 3 denote various directions along the geometric space, with 1 representing the length of the bed.

| Direction | Volume Fraction | Tortuosity $\gamma$ | Bruggeman exponent | Normalized $D_{\text{eff}}$ |
|-----------|-----------------|---------------------|--------------------|-----------------------------|
| 1         | 0.371           | 2.01                | 1.71               | 0.185                       |
| 2         | 0.371           | 1.87                | 1.62               | 0.199                       |
| 3         | 0.371           | 2.02                | 1.70               | 0.184                       |

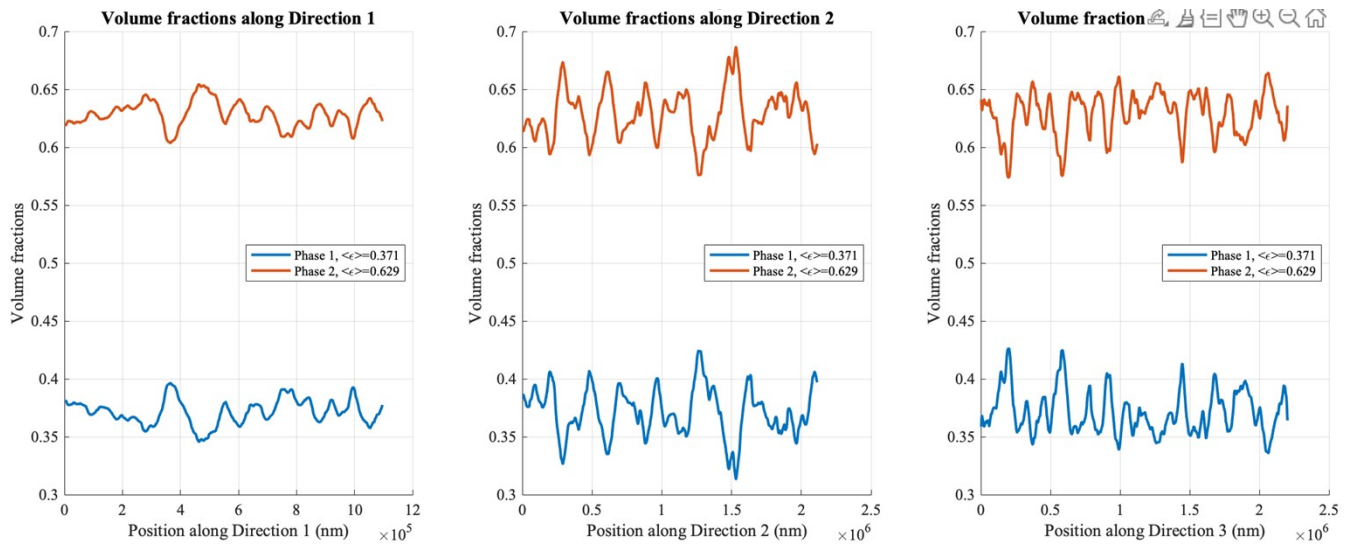

**Figure S2:** Volume fraction of the packed bed consisting of  $\text{Al}_2\text{O}_3$  particles. An average bed porosity of 0.371 was observed in this configuration. Phases 1 and 2 represent the open and solid spaces, respectively.

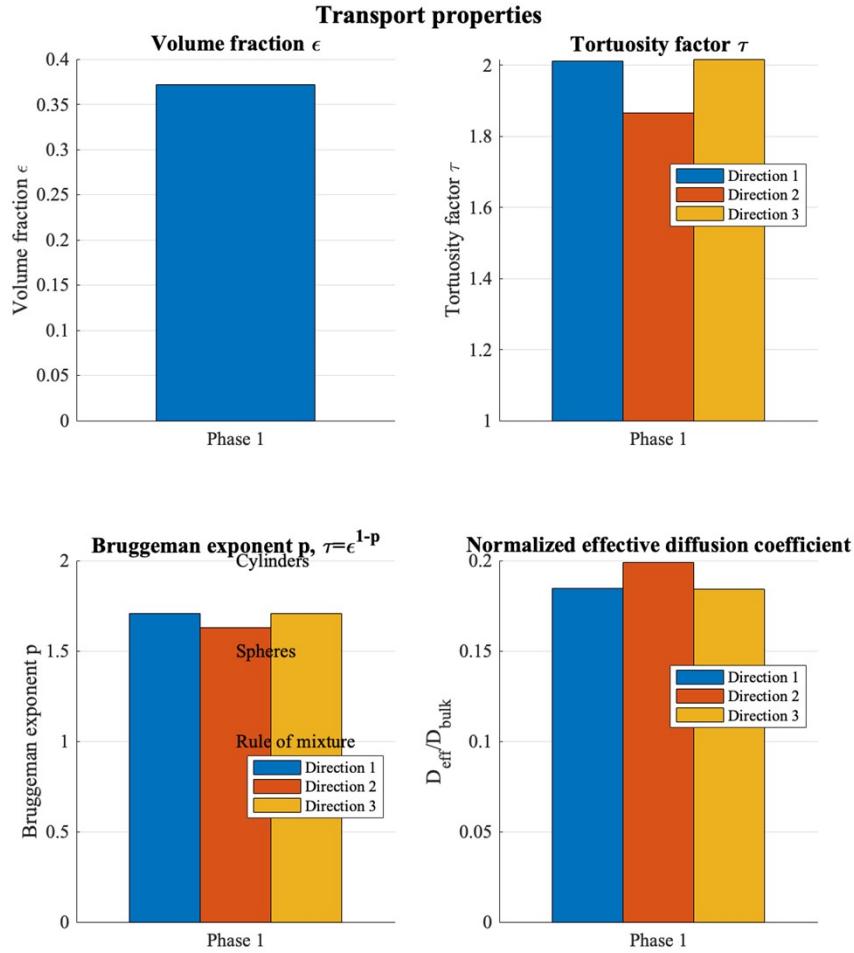

**Figure S3:** Tortuosity and effective diffusivity coefficient of the packed bed consisting of  $\text{Al}_2\text{O}_3$  particles along three directions.

**Table S2:** Particle size distribution (phase 2) of the  $\text{Al}_2\text{O}_3$  packed bed calculated using the CPSD algorithm. The standard deviations (Std) of the calculated values are represented as lengths and percentages. Phase 1 represents the open space (void).

| Phase | Min (nm) | Mean (nm) | Max (nm) | Std (nm) | Std (%) |
|-------|----------|-----------|----------|----------|---------|
| 1     | 6.35E3   | 4.81E4    | 1.13E5   | 1.72E4   | 35.7    |
| 2     | 6.35E3   | 1.14E5    | 2.66E5   | 4.48E4   | 39.2    |

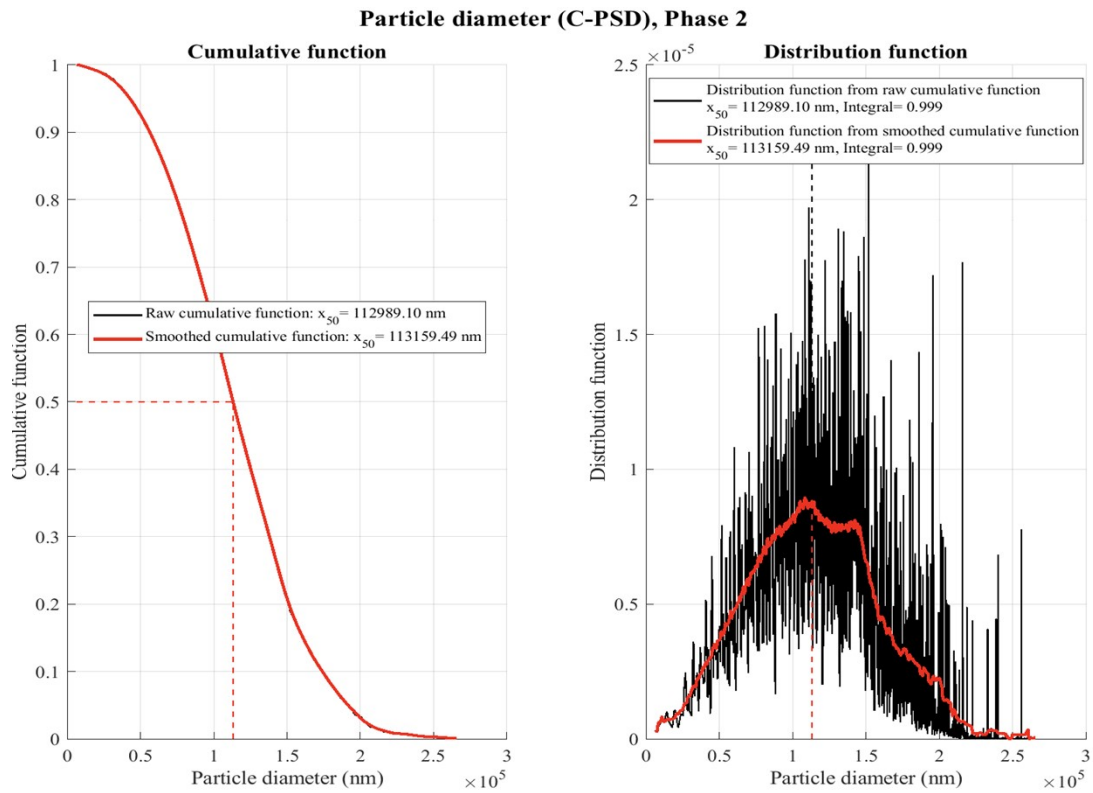

**Figure S4:** Visual of the  $\text{Al}_2\text{O}_3$  particle size distribution in the packed bed calculated using the CPSD algorithm.

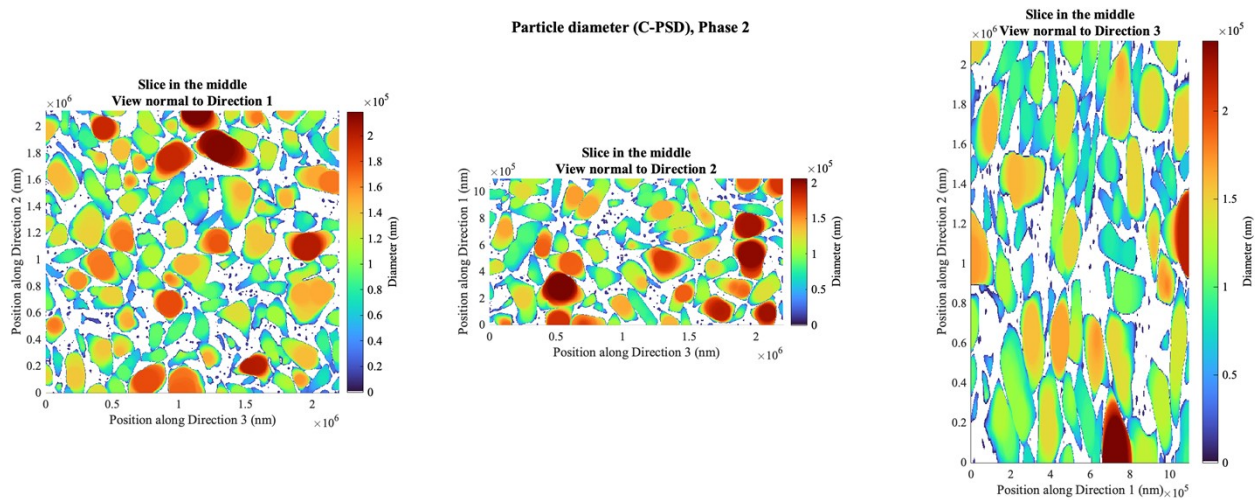

**Figure S5:** Heat map of the  $\text{Al}_2\text{O}_3$  particle size distribution using the CPSD algorithm.

**Table S3:** Particle size distribution (phase 2) of the  $\text{Al}_2\text{O}_3$  packed bed calculated using the EDMF algorithm. The standard deviations (Std) of the calculated values are represented as lengths and percentages. Phase 1 represents the open space (void).

| Phase | Min (nm) | Mean (nm) | Max (nm) | Std (nm) | Std (%) |
|-------|----------|-----------|----------|----------|---------|
| 1     | 3.17E3   | 1.08E4    | 5.66E5   | 6.50E4   | 60.4    |
| 2     | 3.17E3   | 2.15E5    | 1.32E5   | 1.59E4   | 74.0    |

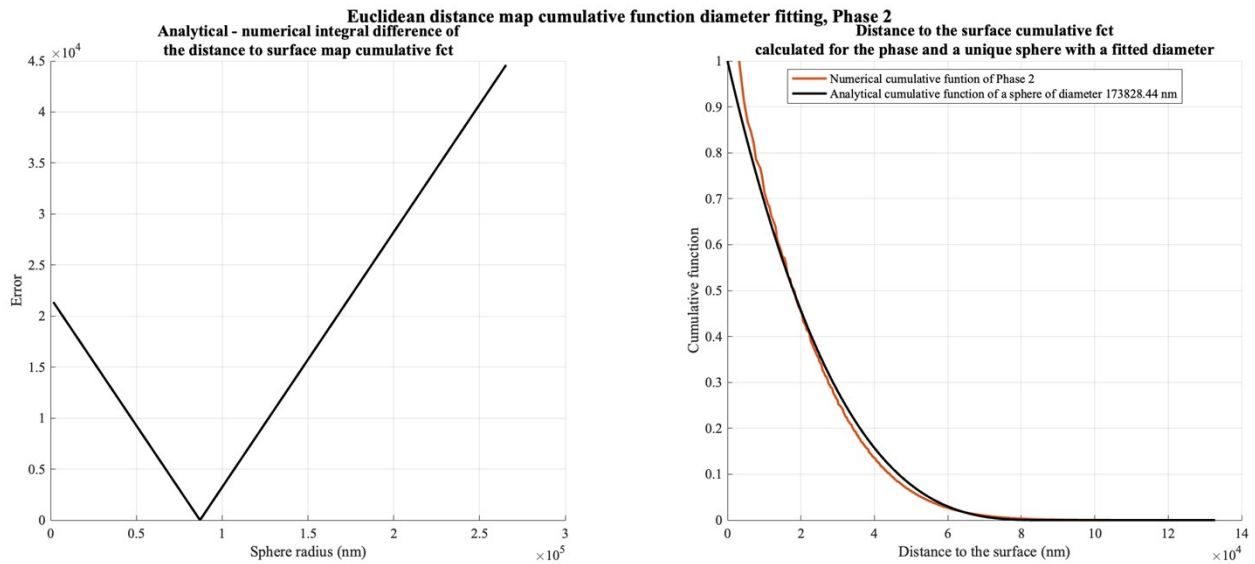

**Figure S6:** Visual of the  $\text{Al}_2\text{O}_3$  particle size distribution in the packed bed calculated using the EDMF algorithm.

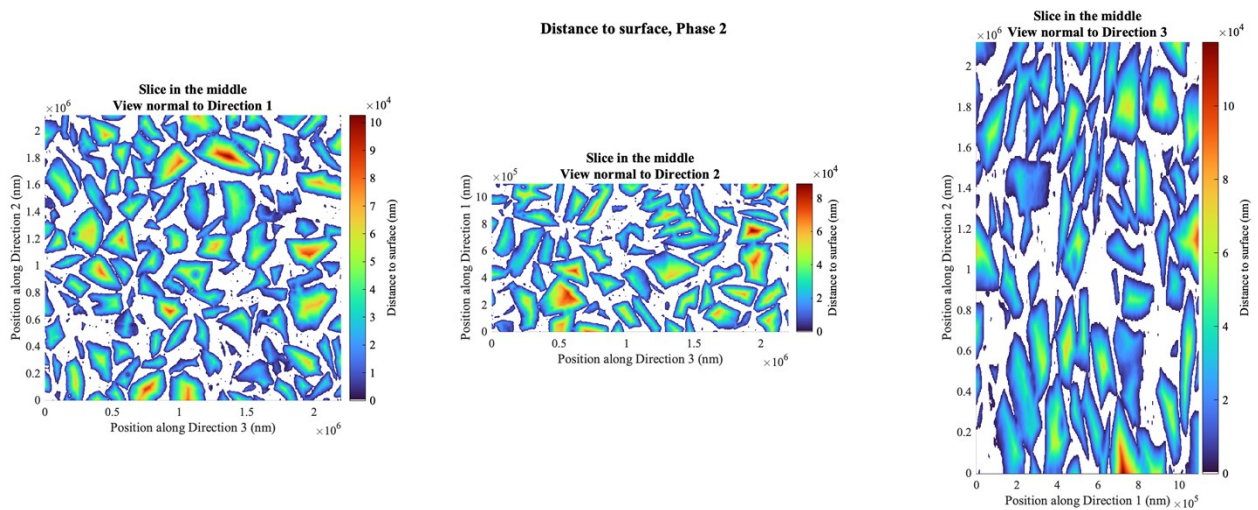

**Figure S7:** Heat map of the  $\text{Al}_2\text{O}_3$  distance to surface distribution using the EDMF algorithm.

## S2. CZA packed bed MicroCT characterization

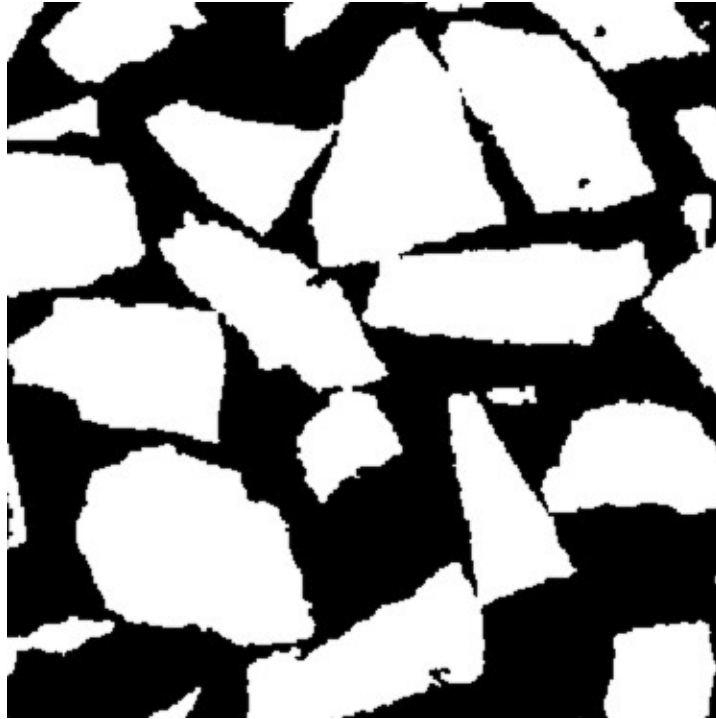

**Figure S8:** Example visual slice of the CZA packed bed reactor processed using MicroCT and MATBOX postprocessing.

**Table S4:** List of physical properties of the CZA packed bed found using the MATBOX software. Here directions 1, 2, 3 denote various directions along the geometric space, with 1 representing the length of the bed.

| Direction | Volume Fraction | Tortuosity | Bruggeman exponent | Normalized $D_{eff}$ |
|-----------|-----------------|------------|--------------------|----------------------|
| 1         | 0.446           | 1.91       | 1.80               | 0.233                |
| 2         | 0.446           | 1.59       | 1.58               | 0.278                |
| 3         | 0.446           | 1.60       | 1.58               | 0.278                |

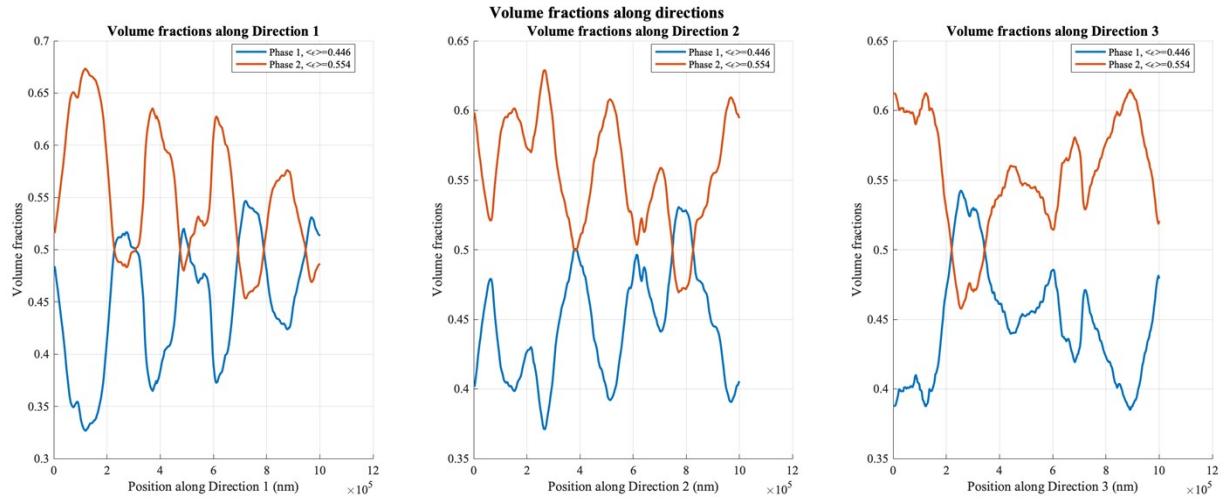

**Figure S9:** Volume fraction of the packed bed consisting of CZA particles. A porosity of 0.446 was observed in this configuration.

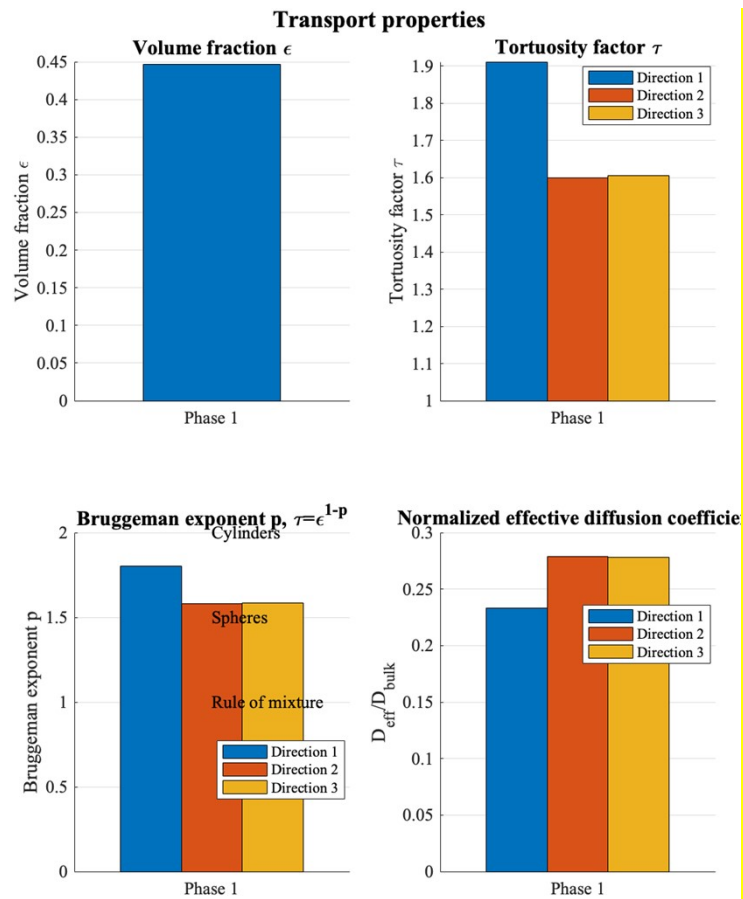

**Figure S10:** Tortuosity and effective diffusivity coefficient of the packed bed consisting of CZA particles along three directions.

**Table S5:** Particle size distribution (phase 2) of the CZA in the packed bed reactor calculated using the CPSD algorithm. The standard deviations (Std) of the calculated values are represented as lengths and percentages. Phase 1 represents the open space (void).

| Phase | Min (nm) | Mean (nm) | Max (nm) | Std (nm) | Std (%) |
|-------|----------|-----------|----------|----------|---------|
| 1     | 6.35E3   | 8.98E4    | 2.08E5   | 4.26E4   | 47.4    |
| 2     | 6.35E3   | 1.15E5    | 2.57E5   | 4.18E4   | 36.2    |

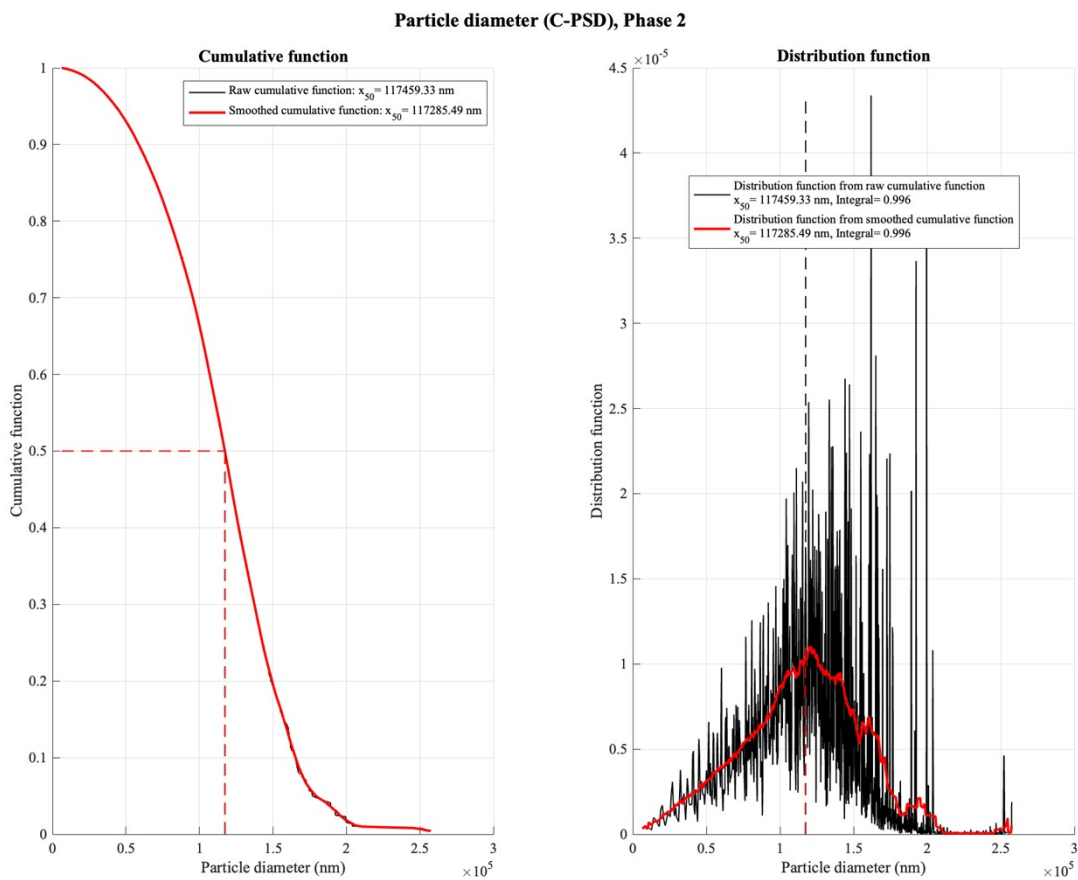

**Figure S11:** Visual of the CZA particle size distribution in the packed bed calculated using the CPSD algorithm.



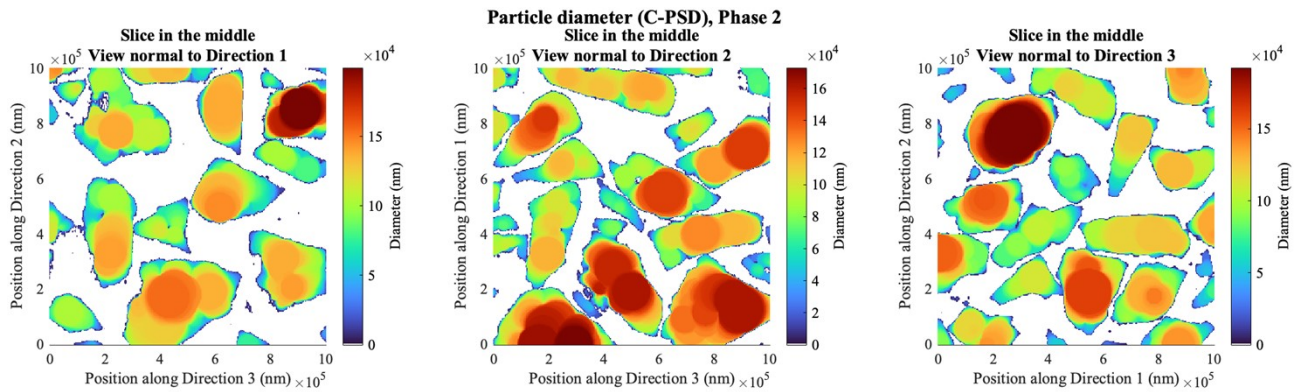

**Figure S12:** Heat map of the CZA particle size distribution using the CPSD algorithm.

**Table S6:** Distance to surface distribution (phase 2) of the CZA in the packed bed reactor calculated using the EDMF algorithm. The standard deviations (Std) of the calculated values are represented as lengths and percentages. Phase 1 represents the open space (void).

| Phase | Min (nm) | Mean (nm) | Max (nm) | Std (nm) | Std(%) |
|-------|----------|-----------|----------|----------|--------|
| 1     | 3.18E3   | 1.84E4    | 1.04E5   | 1.36E4   | 73.7   |
| 2     | 3.18E3   | 2.26E5    | 1.28E5   | 1.60E4   | 71.0   |

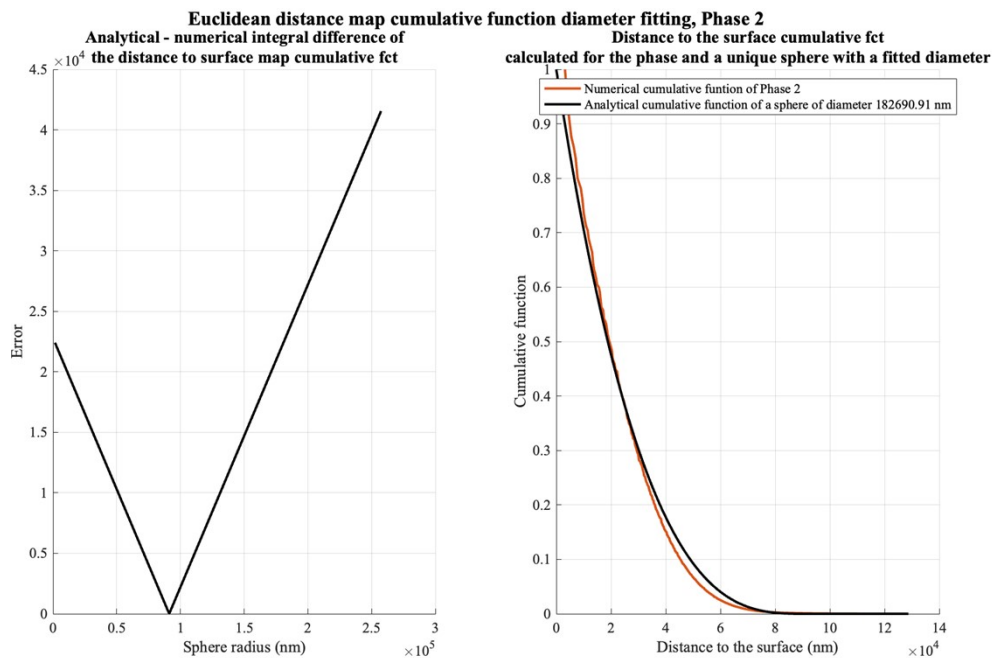

**Figure S13:** Visual of the CZA particle size distribution in the packed bed calculated using the EDMF algorithm.

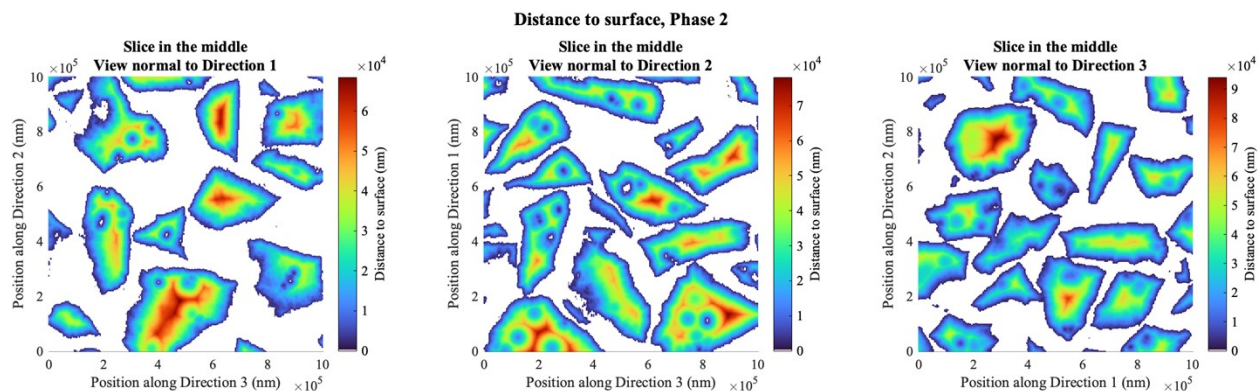

**Figure S14:** Heat map of the CZA distance to surface distribution using the EDMF algorithm.

### S3. CZA and Al<sub>2</sub>O<sub>3</sub> mixed packed bed MicroCT characterization

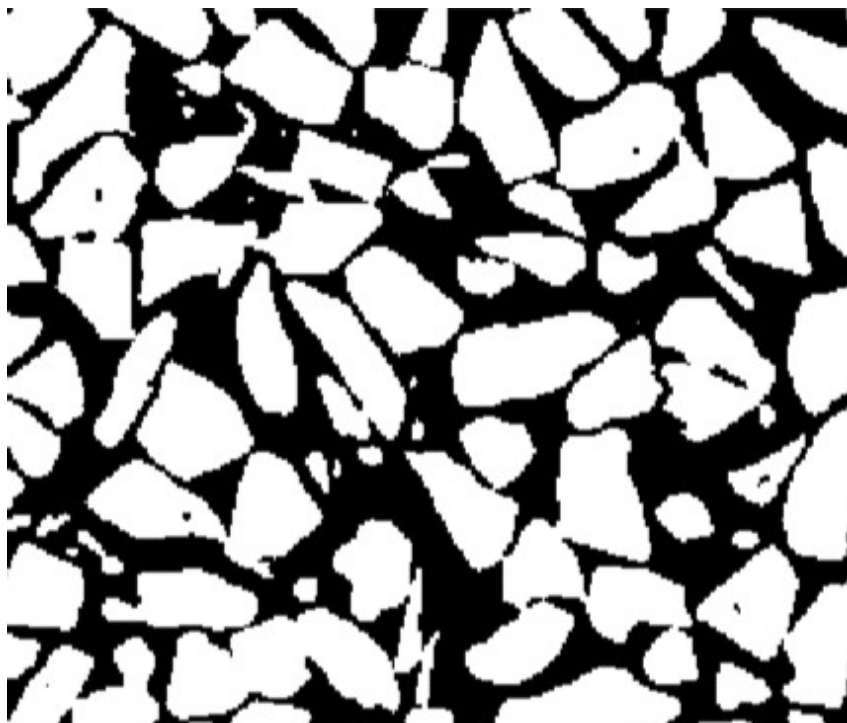

**Figure S15:** Example visual slice of the mixed packed bed reactor processed using MicroCT and MATBOX postprocessing.

**Table S7:** List of physical properties of the mixed packed bed found using the MATBOX software. Here directions 1, 2, 3 denote various directions along the geometric space, with 3 representing the length of the bed.

| Direction | Volume Fraction | Tortuosity | Bruggeman exponent | Normalized $D_{eff}$ |
|-----------|-----------------|------------|--------------------|----------------------|
| 1         | 0.397           | 1.75       | 1.60               | 0.227                |
| 2         | 0.397           | 1.74       | 1.60               | 0.228                |
| 3         | 0.397           | 2.02       | 1.76               | 0.197                |

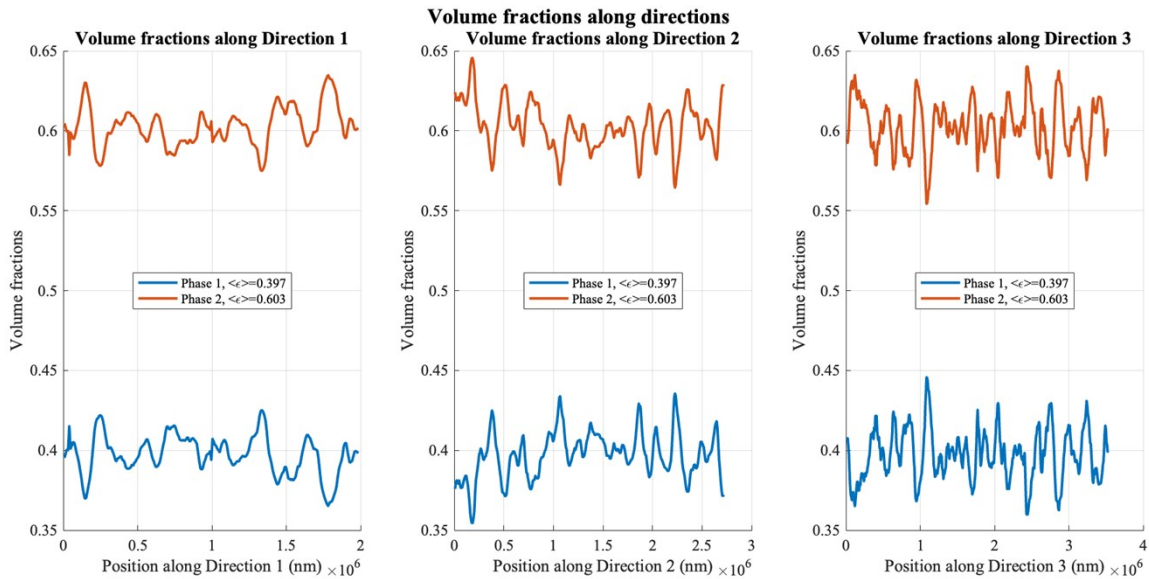

**Figure S16:** Volume fraction of the packed bed consisting of mixed particles. A porosity of 0.397 was observed in this configuration.

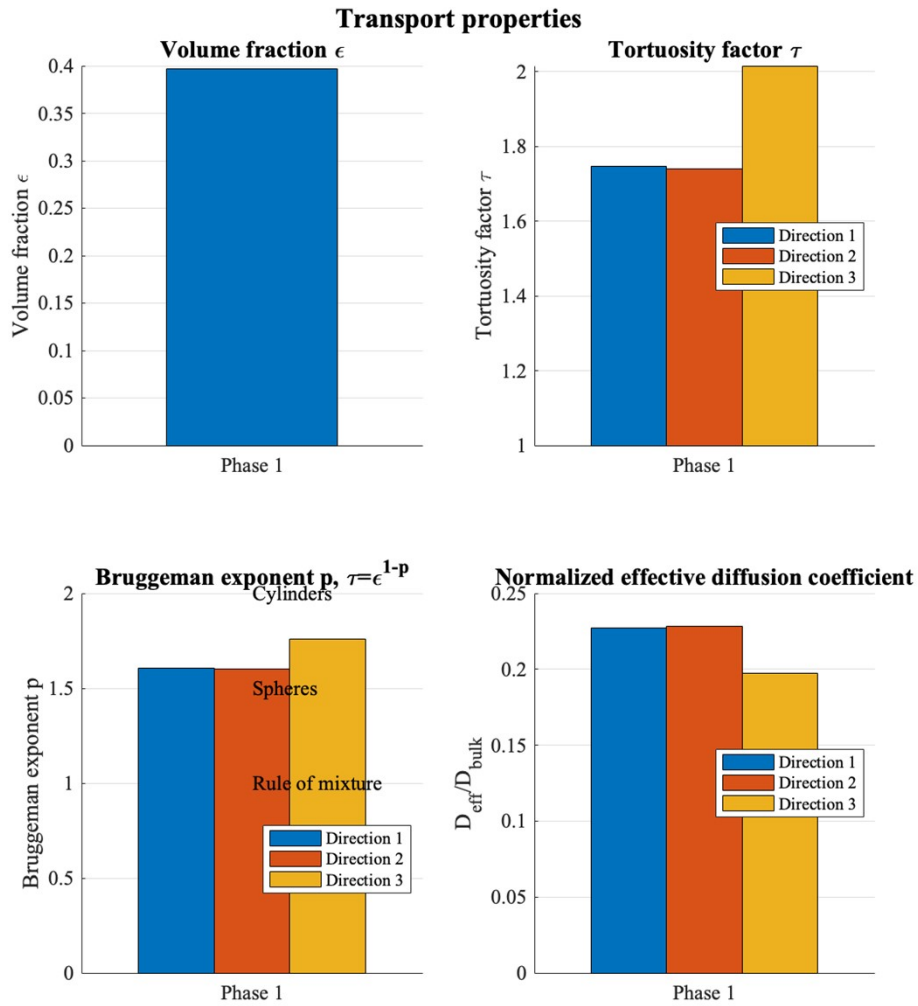

**Figure S17:** Tortuosity and effective diffusivity coefficient of the packed bed consisting of mixed particles along three directions.

#### S4. Al<sub>2</sub>O<sub>3</sub> pellet NanoCT characterization

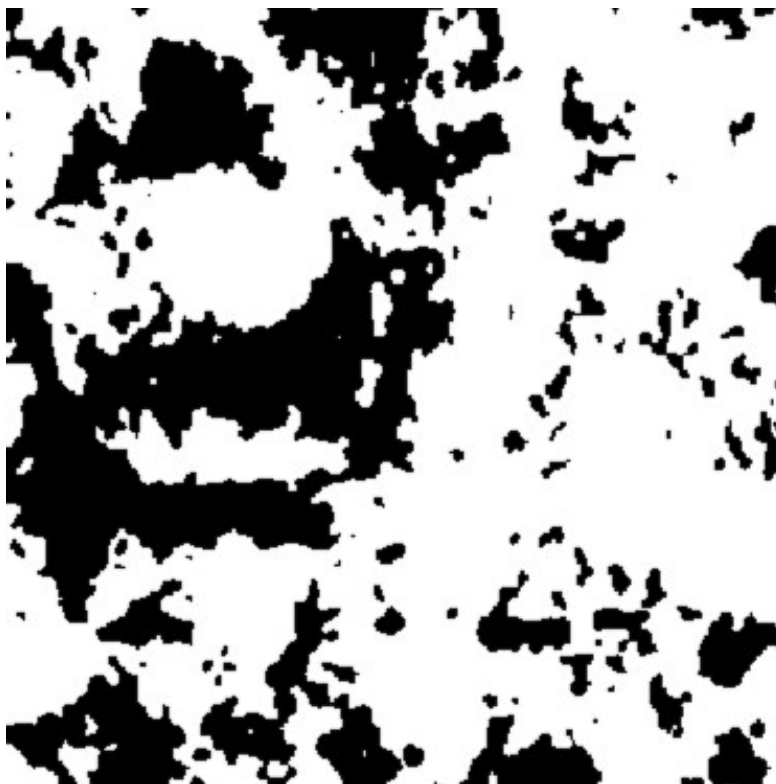

**Figure S18:** Example visual slice of the Al<sub>2</sub>O<sub>3</sub> pellet processed using NanoCT and MATBOX postprocessing.

**Table S8:** List of physical properties of the Al<sub>2</sub>O<sub>3</sub> pellet found using the MATBOX software.

| Direction | Volume Fraction | Tortuosity | Bruggeman exponent | Normalized D <sub>eff</sub> |
|-----------|-----------------|------------|--------------------|-----------------------------|
| 1         | 0.384           | 3.36       | 2.26               | 0.114                       |
| 2         | 0.384           | 10.49      | 3.45               | 0.037                       |
| 3         | 0.384           | 3.79       | 2.39               | 0.101                       |

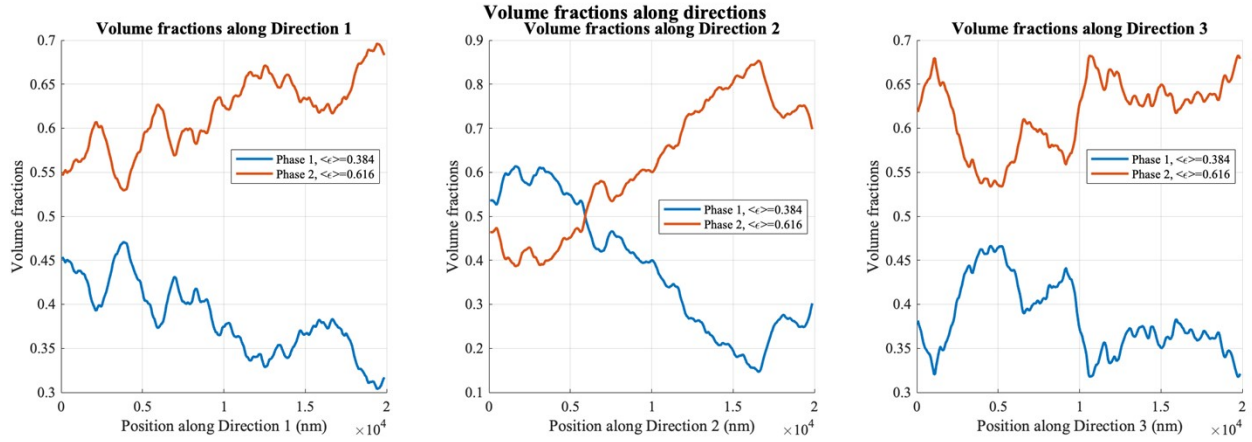

**Figure S19:** Volume fraction of the  $\text{Al}_2\text{O}_3$  pellet. A porosity of was 0.384 observed in this configuration.

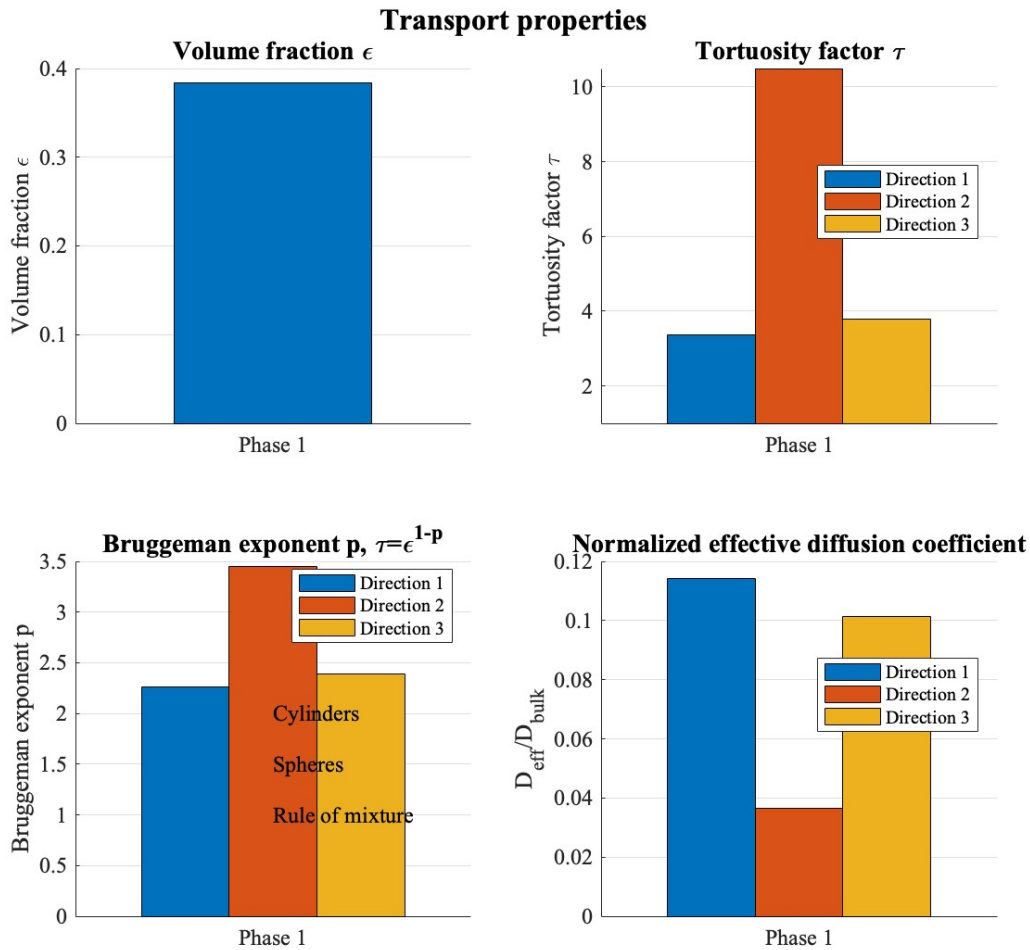

**Figure S20:** Tortuosity and effective diffusivity coefficient of the  $\text{Al}_2\text{O}_3$  pellet along three directions.

**Table S9:** Pore distribution (phase 1) of the Al<sub>2</sub>O<sub>3</sub> pellet calculated using the CPSD algorithm.

| Phase | Min (nm) | Mean (nm) | Max (nm) | Std (nm) | Std(%) |
|-------|----------|-----------|----------|----------|--------|
| 1     | 1.32E2   | 1.20E3    | 3.92E3   | 8.85E2   | 73.6   |
| 2     | 1.32E2   | 1.23E3    | 4.13E3   | 6.52E2   | 53     |

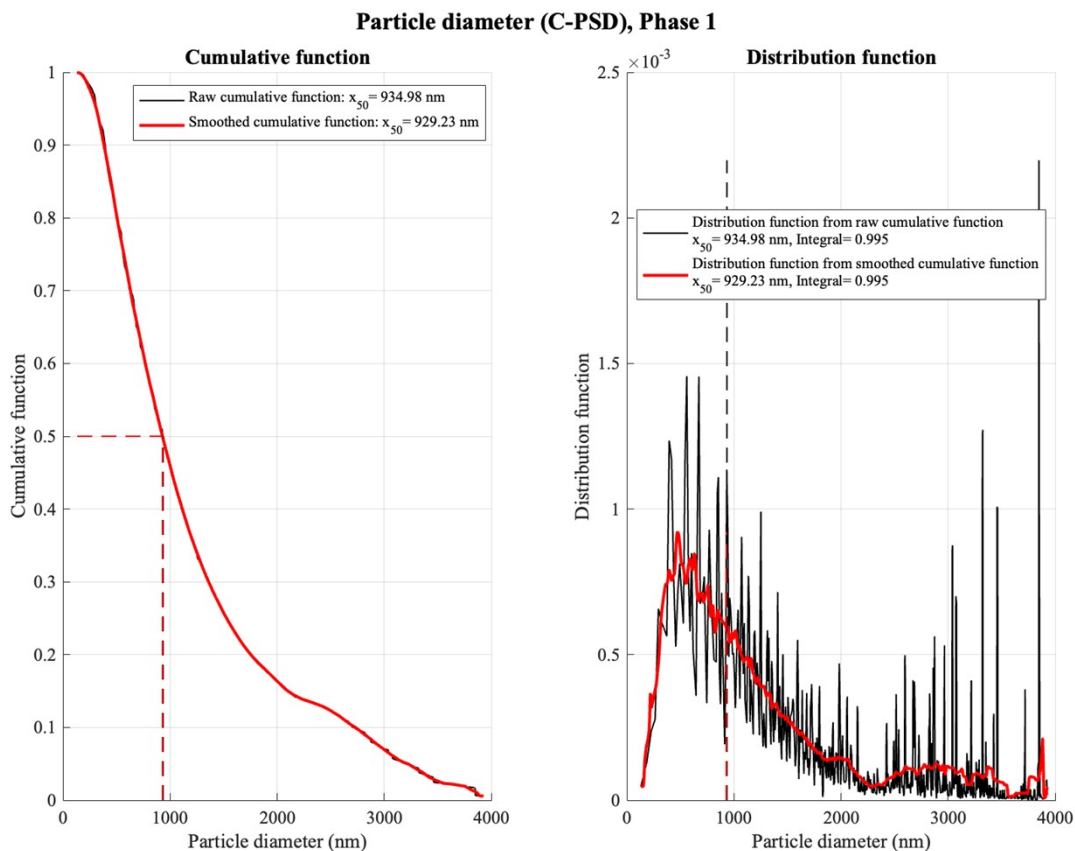

**Figure S21:** Visual of the Al<sub>2</sub>O<sub>3</sub> pellet pore size distribution using the CPSD algorithm.

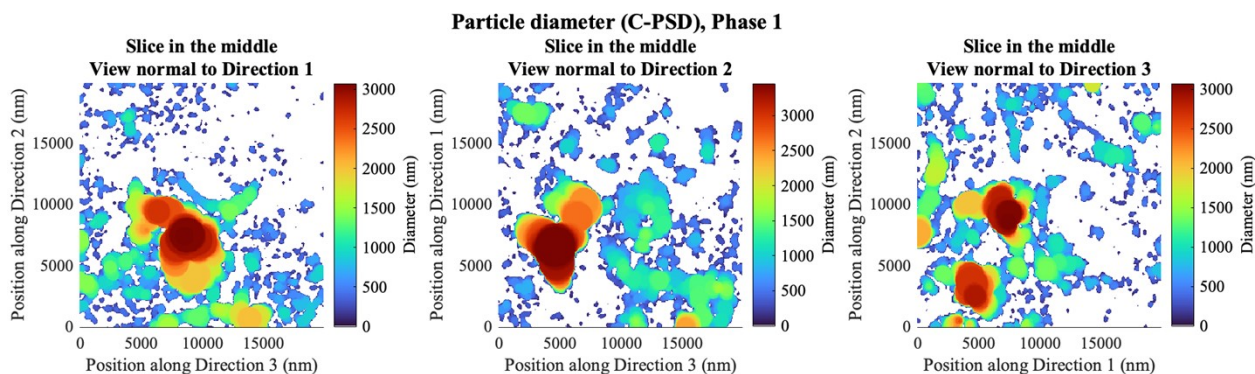

**Figure S22:** Heat map of the Al<sub>2</sub>O<sub>3</sub> pellet pore size distribution using the CPSD algorithm.

**Table S10:** Pore size distribution (phase 1) of the  $\text{Al}_2\text{O}_3$  pellet calculated using the EDMF algorithm.

| Phase | Min nm | Mean nm | Max nm | Std nm | Std% |
|-------|--------|---------|--------|--------|------|
| 1     | 6.60E1 | 2.55E2  | 1.96E3 | 2.33E2 | 91.4 |
| 2     | 6.60E1 | 2.71E2  | 2.06E3 | 1.94E2 | 71.6 |

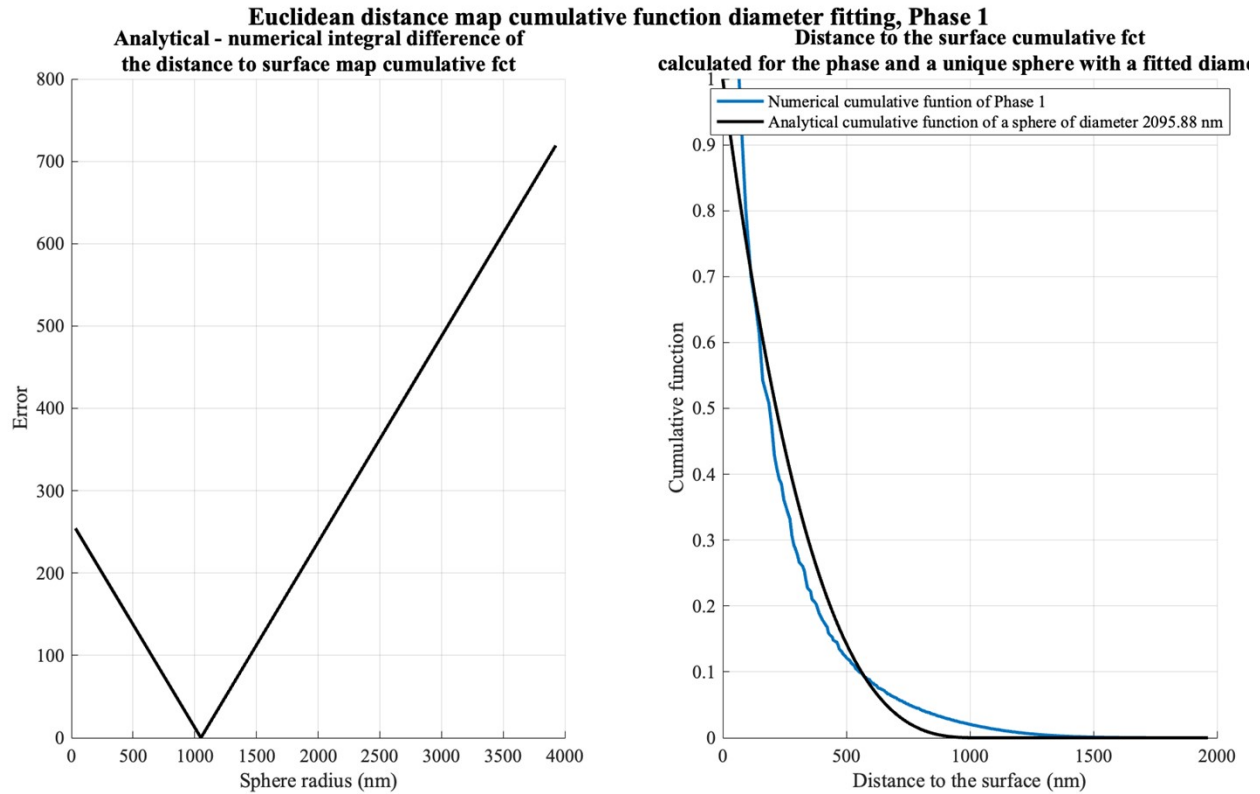

**Figure S23:** Visual of the  $\text{Al}_2\text{O}_3$  particle size distribution in the packed bed calculated using the EDMF algorithm.

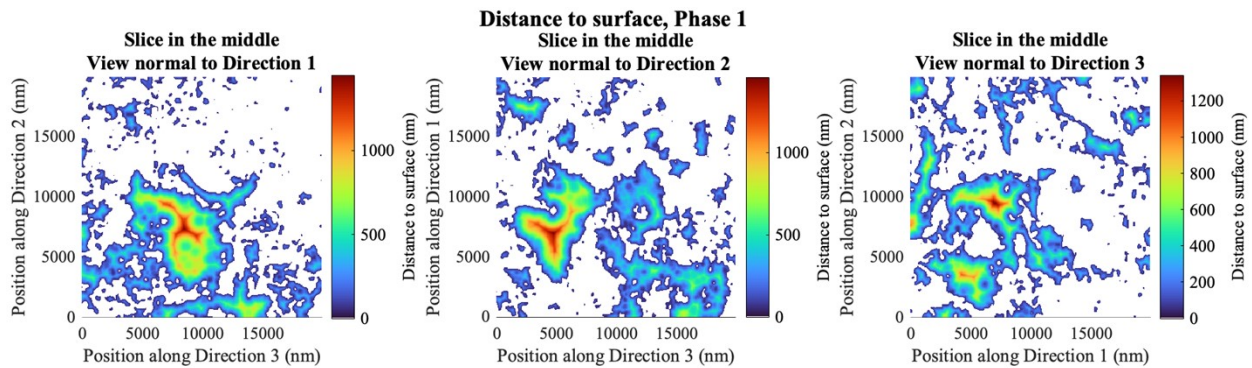

**Figure S24:** Heat map of the  $\text{Al}_2\text{O}_3$  distance to surface distribution using the EDMF algorithm



## S5. CZA pellet NanoCT characterization

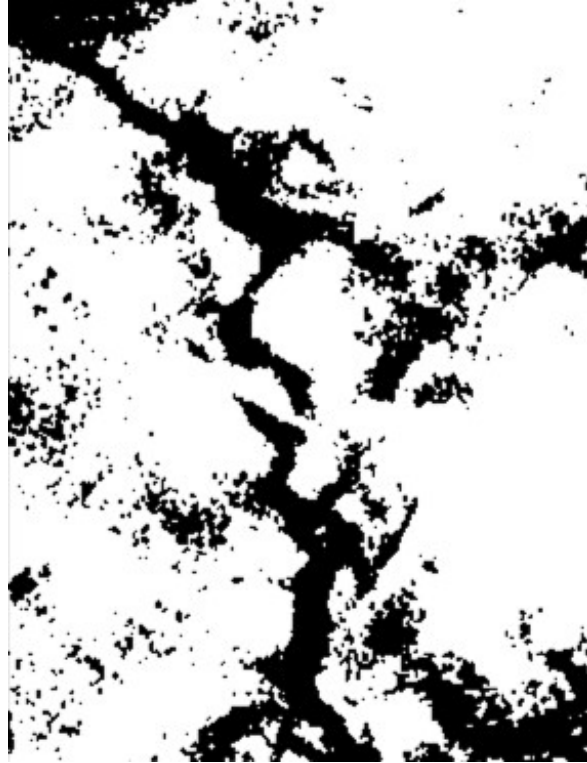

**Figure S25:** Example visual slice of the CZA pellet processed using NanoCT and MATBOX postprocessing.

**Table S11:** List of physical properties of the CZA pellet found using the MATBOX software.

| Direction | Volume Fraction | Tortuosity $\gamma$ | Bruggeman exponent | Normalized $D_{eff}$ |
|-----------|-----------------|---------------------|--------------------|----------------------|
| 1         | 0.293           | 3.70                | 2.06               | 0.079                |
| 2         | 0.293           | 4.28                | 2.19               | 0.069                |
| 3         | 0.293           | 3.08                | 1.92               | 0.095                |

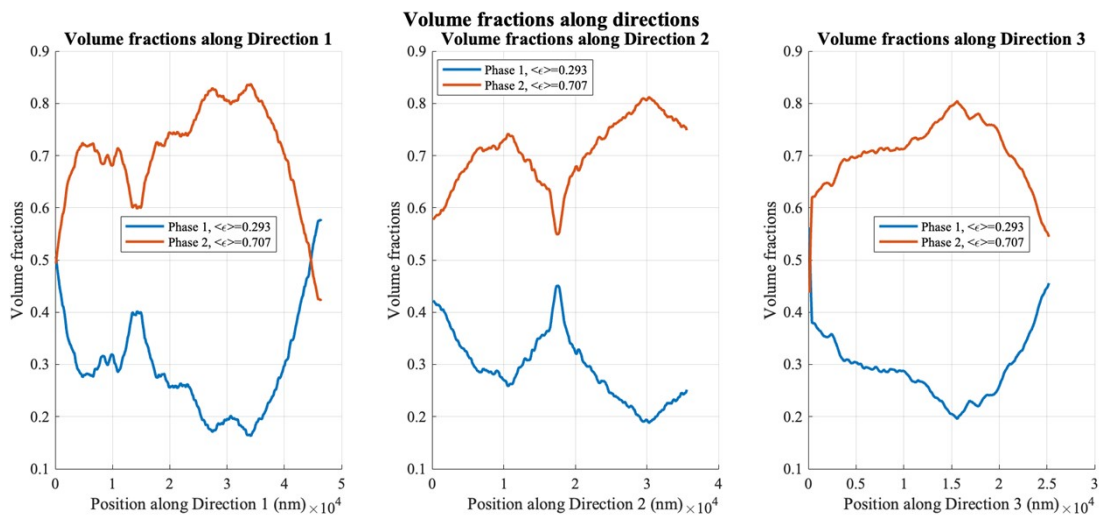

**Figure S26:** Volume fraction of the CZA pellet. A porosity of 0.293 was observed in this configuration.

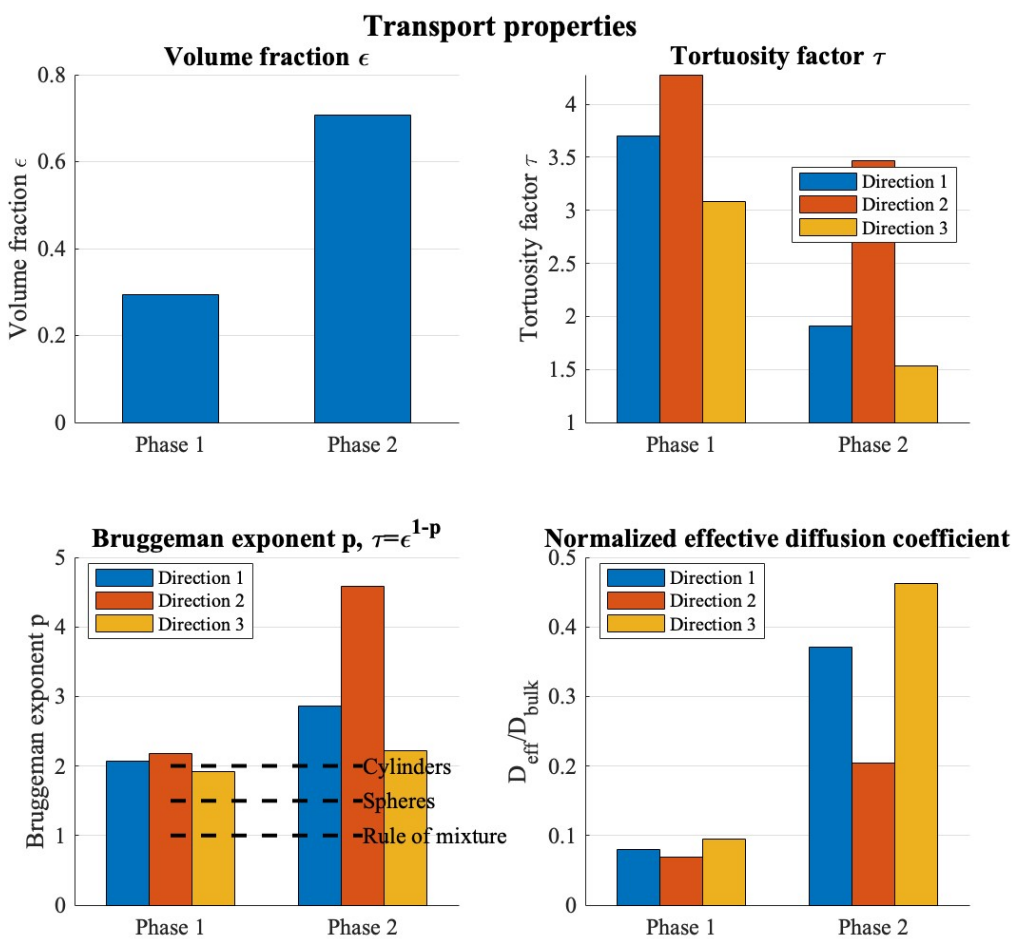

**Figure S27:** Tortuosity and effective diffusivity coefficient of the CZA pellet along three directions.

**Table S12:** Pore distribution (phase 1) of the CZA pellet calculated using the CPSD algorithm. Phase 2 represents the solid phase.

| Phase | Min nm | Mean nm | Max nm | Std nm | Std%  |
|-------|--------|---------|--------|--------|-------|
| 1     | 2.56E2 | 1.48E3  | 1.25E4 | 1.72E3 | 115.9 |
| 2     | 2.56E2 | 2.28E3  | 9.22E3 | 1.87E3 | 82.0  |

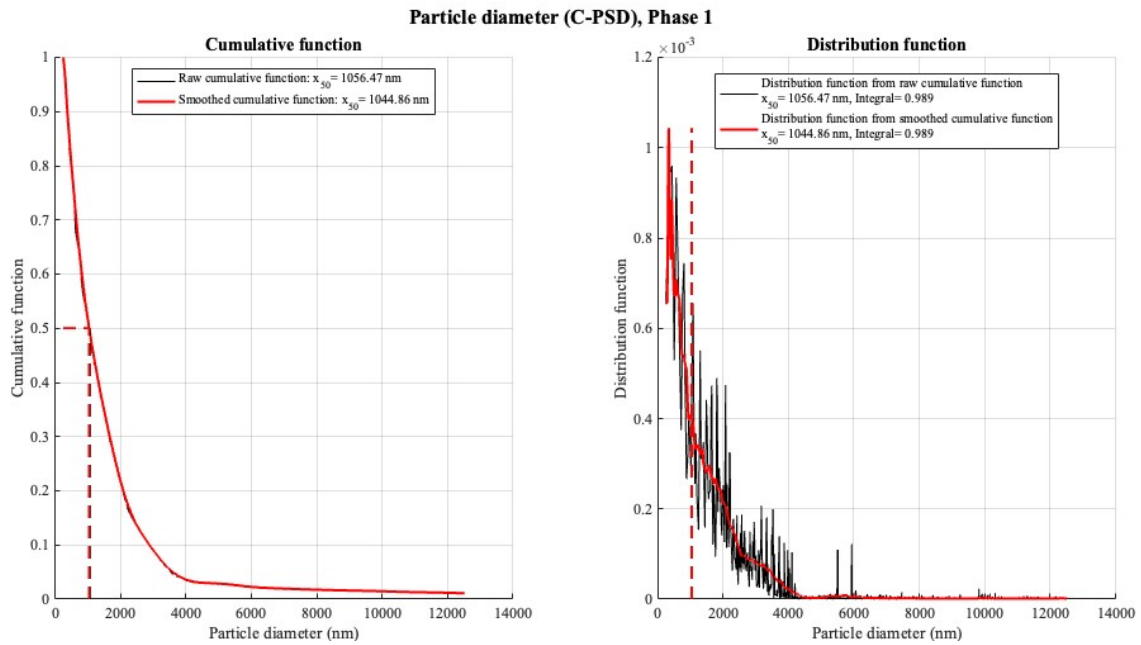

**Figure S28:** Visual of the CZA pellet pore size distribution using the CPSD algorithm.

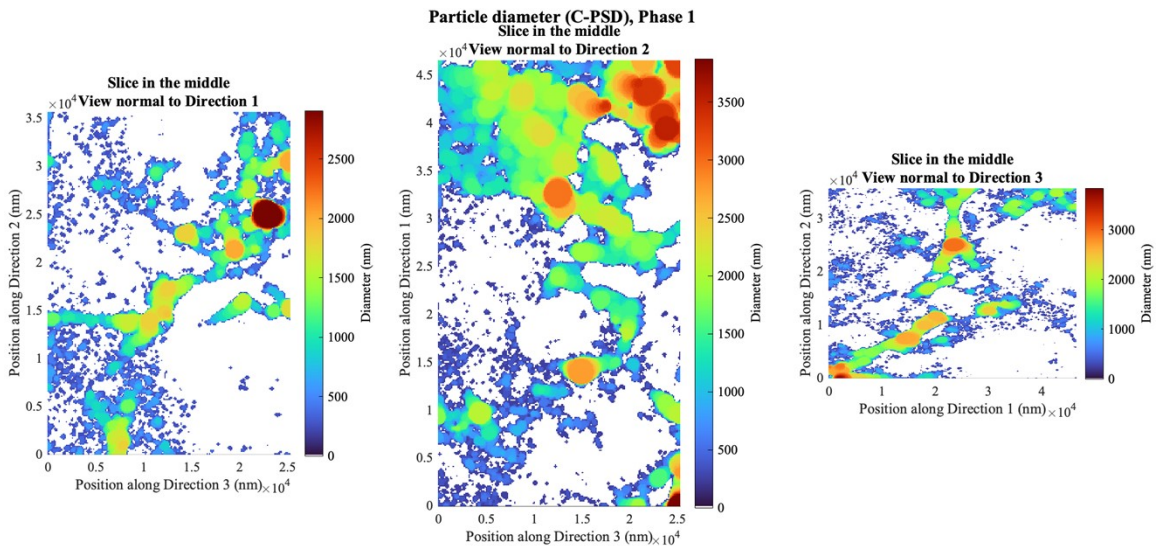

**Figure S29:** Heat map of the CZA pellet pore size distribution using the CPSD algorithm.

**Table S13:** Pore size distribution (phase 1) of the CZA pellet calculated using the EDMF algorithm.

| Phase | Min nm | Mean nm | Max nm | Std nm | Std%  |
|-------|--------|---------|--------|--------|-------|
| 1     | 1.28E2 | 3.39E2  | 6.26E3 | 3.17E2 | 109.7 |
| 2     | 1.28E2 | 5.14E2  | 4.61E3 | 4.79E2 | 93.2  |

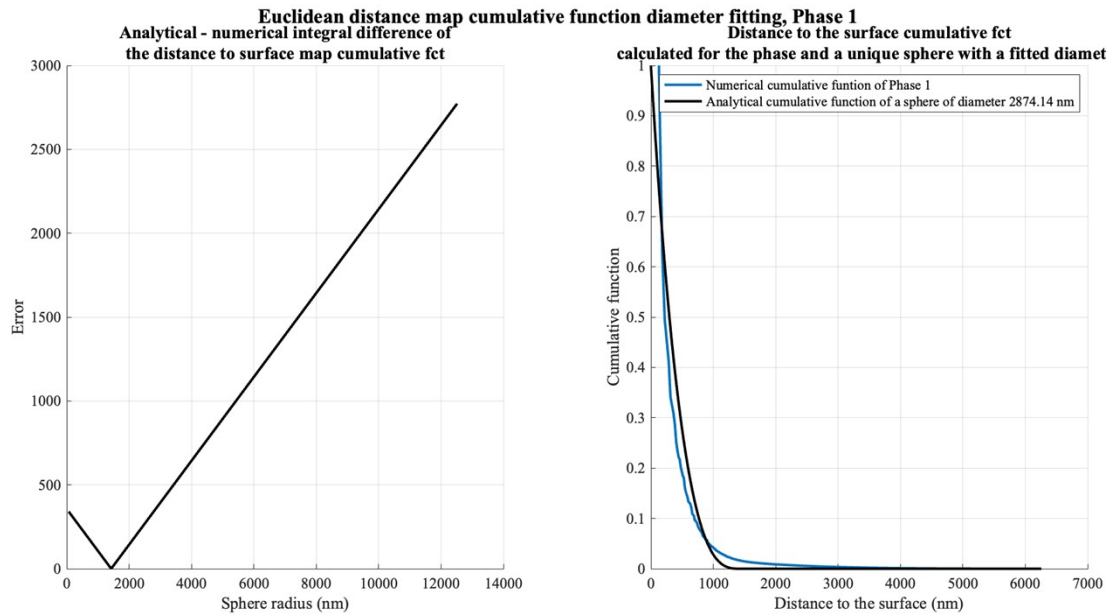

**Figure S30:** Visual of the CZA particle size distribution in the packed bed calculated using the EDMF algorithm.

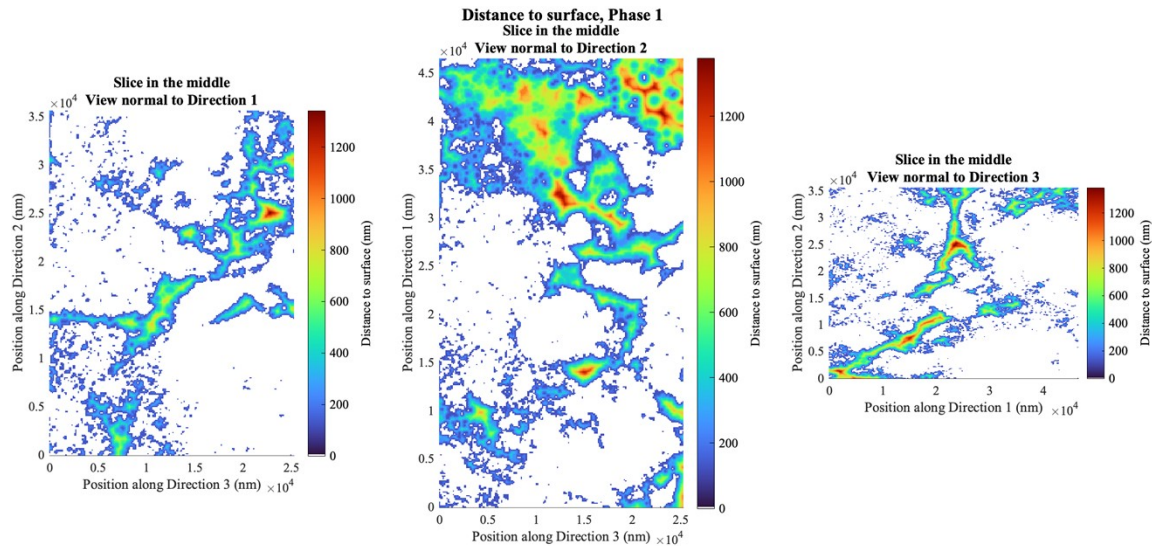

**Figure S31:** Heat map of the CZA distance to surface distribution using the EDMF algorithm

## S6. Al<sub>2</sub>O<sub>3</sub> TEM characterization

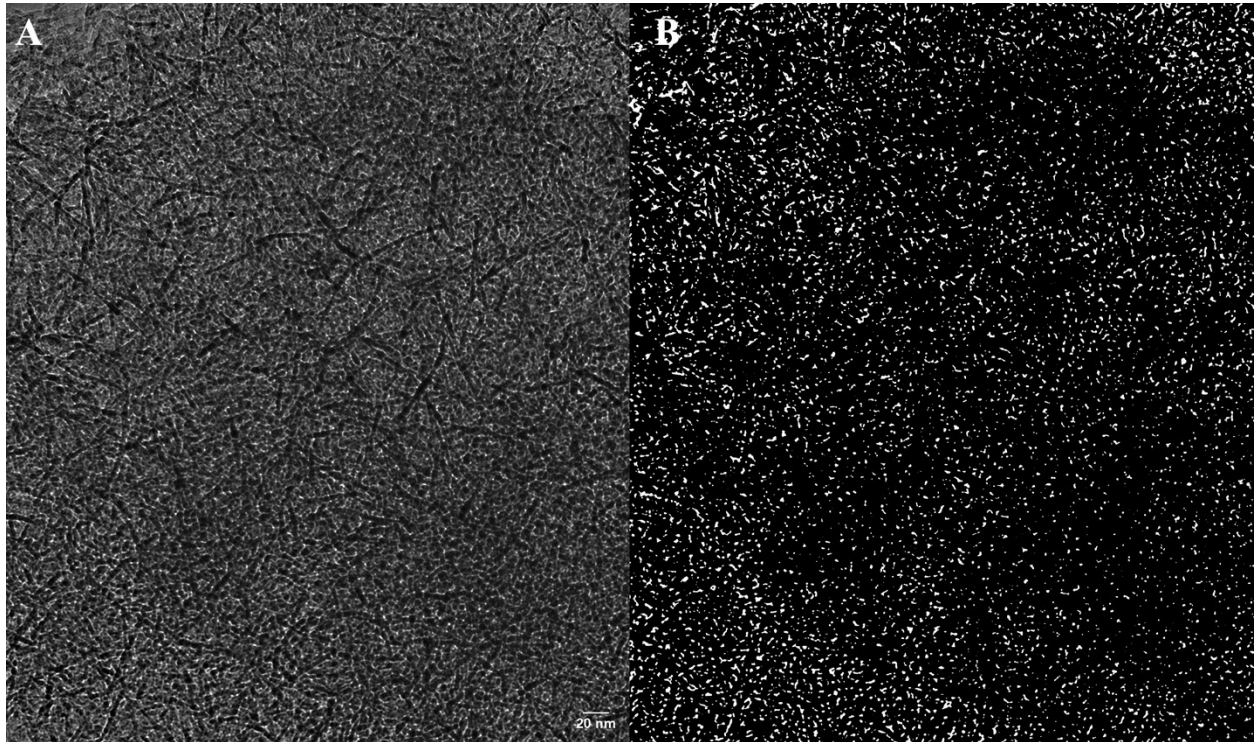

**Figure S32:** A TEM scan (A) and the associated binary reconstruction (B) of the Al<sub>2</sub>O<sub>3</sub> at 25x magnification

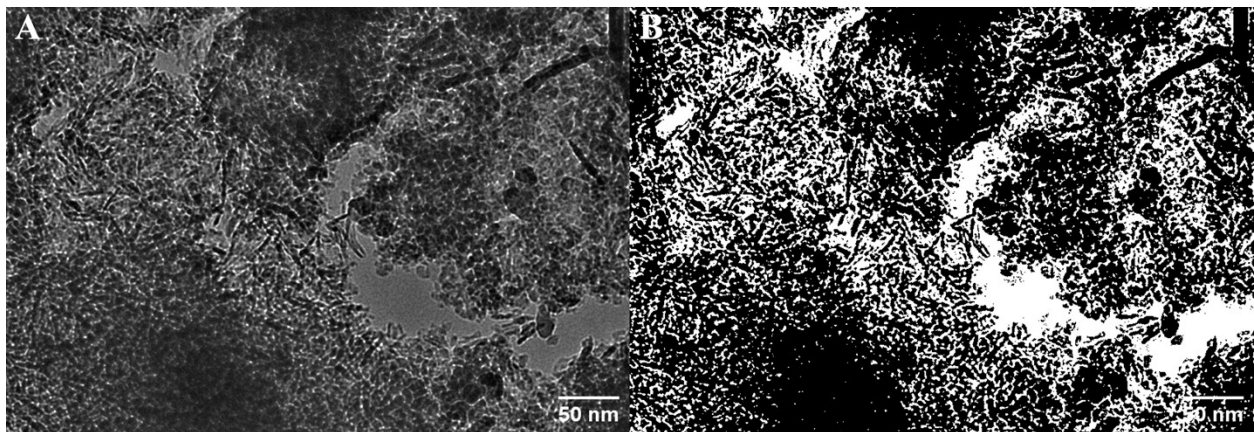

**Figure S33:** A TEM scan (A) and the associated binary reconstruction (B) of the Al<sub>2</sub>O<sub>3</sub> at 11.5x magnification

**Table S14:** Al<sub>2</sub>O<sub>3</sub> pore size and porosity analysis of TEM images. Images 13xx (11.5x magnification) and 14xx (25x magnification) cover different areas (2 to 3 times difference) and their individual averages were calculated.

| <b>Image</b>                       | <b>Count</b> | <b>Total Area (nm<sup>2</sup>)</b> | <b>Average Size (nm)</b> | <b>% Area</b> |
|------------------------------------|--------------|------------------------------------|--------------------------|---------------|
| 1370                               | 4769         | 55824                              | 11.706                   | 31.36         |
| 1371                               | 4561         | 54284                              | 11.902                   | 26.61         |
| 1372                               | 2236         | 37886                              | 16.94                    | 29.98         |
| 1373                               | 6370         | 71669                              | 11.25                    | 33.817        |
| 1374                               | 6301         | 48015                              | 7.62                     | 18.488        |
| 1375                               | 5185         | 42323                              | 8.163                    | 13.5          |
| 1376                               | 5792         | 67377                              | 11.63                    | 22.385        |
| 1377                               | 8304         | 80008                              | 9.635                    | 27.411        |
| 1393                               | 7348         | 80469                              | 10.95                    | 20.94         |
| 1394                               | 5394         | 64083                              | 11.88                    | 20.137        |
| 1407                               | 7649         | 18980                              | 2.481                    | 7.043         |
| 1408                               | 4418         | 5405                               | 1.224                    | 2.006         |
| 1409                               | 7700         | 21291                              | 2.765                    | 7.9           |
| 1422                               | 3345         | 12180                              | 3.641                    | 4.519         |
| 1423                               | 3735         | 15064                              | 4.033                    | 5.919         |
| <b>Average</b>                     | <b>5540</b>  | <b>44990</b>                       | <b>8.388</b>             | <b>18.134</b> |
| 13xx<br>Average<br>(lower<br>mag)  | 5626         | 60194                              | 11.168                   | 24.463        |
| 14xx<br>Average<br>(higher<br>mag) | 5369.4       | 14584                              | 2.829                    | 5.477         |

## S7. CZA TEM characterization

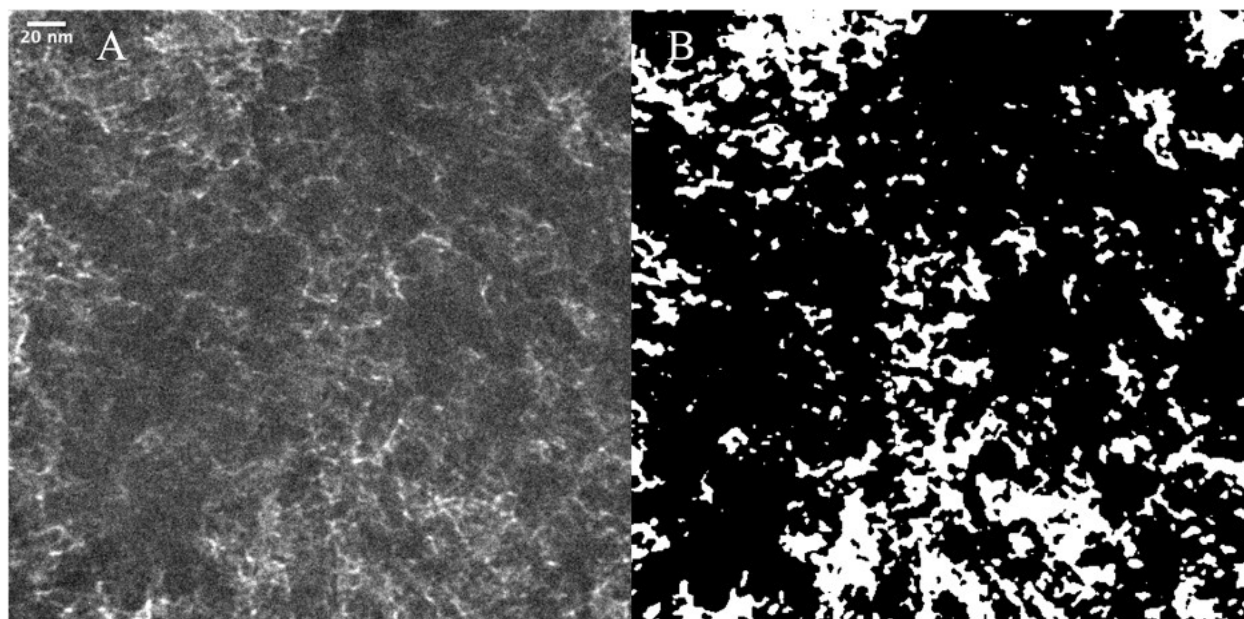

**Figure S34:** A TEM image (A) and the associated binary image (B) of the CZA at 11.5x magnification

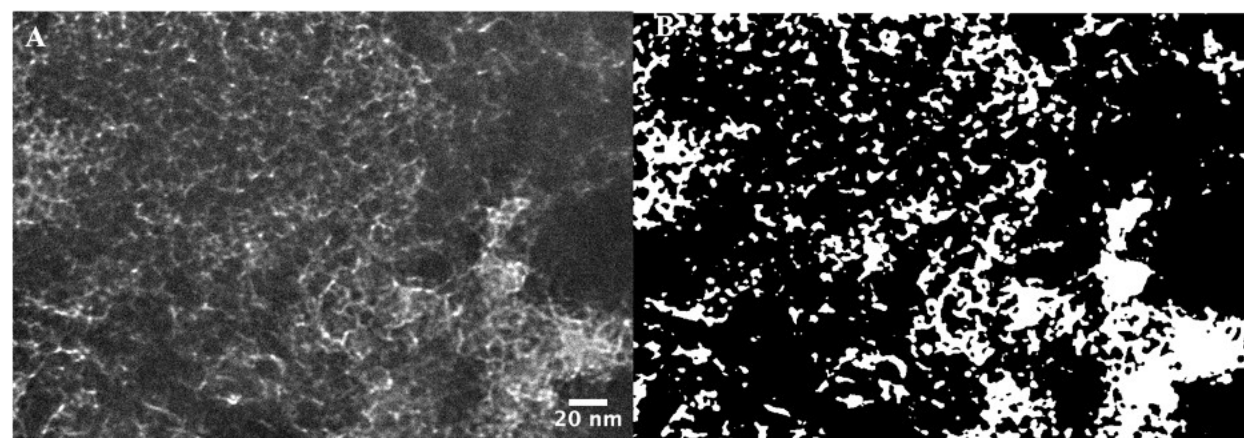

**Figure S35:** A TEM image (A) and the associated binary image (B) of the CZA at 19x magnification

**Table S15:** CZA pore size and porosity analysis of TEM images

| <b>Image</b>   | <b>Count</b> | <b>Total Area (nm<sup>2</sup>)</b> | <b>Average size (nm)</b> | <b>% Area</b> |
|----------------|--------------|------------------------------------|--------------------------|---------------|
| 1288           | 286          | 5972.284                           | 20.882                   | 7.889         |
| 1326           | 786          | 8886.642                           | 11.306                   | 9.365         |
| 1312           | 944          | 15535.752                          | 16.457                   | 21.378        |
| 1311           | 246          | 3901.755                           | 15.861                   | 16.676        |
| 1308           | 545          | 18006.914                          | 33.04                    | 17.904        |
| 1301           | 350          | 11041.772                          | 31.548                   | 10.058        |
| 1328           | 961          | 13273.014                          | 13.812                   | 15.43         |
| 1312           | 537          | 17004.124                          | 31.665                   | 23.399        |
| 1298           | 138          | 2147.471                           | 15.561                   | 9.399         |
| 1324           | 504          | 9379.201                           | 18.61                    | 8.117         |
| 1299           | 327          | 5875.596                           | 17.968                   | 21.713        |
| 1317           | 629          | 11645.743                          | 18.515                   | 11.48         |
| 1291           | 364          | 8596.953                           | 23.618                   | 21.618        |
| 1305           | 221          | 2620.527                           | 11.858                   | 12.472        |
| 1323           | 389          | 11739.222                          | 30.178                   | 13.625        |
| <b>Average</b> | <b>482</b>   | <b>9708.465</b>                    | <b>20.725</b>            | <b>14.702</b> |
